# Supplementary material for: Terminalia catappa Extract Palliates Redox Imbalance and Inflammation in Diabetic Rats by Upregulating Nrf-2 Gene
Source: Int J Inflam. 2021 Dec 16;2021:9778486. doi: 10.1155/2021/9778486 (PMC8702315; doi:10.1155/2021/9778486)
Supplement: Supplementary Materials — Table S1: grid map specifications for molecular docking. Figure S1: representation of (a) modelled Nrf-2 structure and (b) corresponding Ramachandran plot. Figure S2: 2D representation of (a) 9-Oxabicyclo[3.3.1]nonane-2,6-diol, (b) 1,2,3-Benzenetriol, (c) glibenclamide, and (d) metformin interactions in the binding pocket of Nrf-2. Green, light blue, pink, orange, violet, and broken red lines represent conventional hydrogen, carbon-hydrogen, pi-alkyl, salt bridge, pi-sigma, and unfavourable bonds, respectively. Light green circles represent Van der Waals interactions. Figure S3: 2D representation of (a) 9-Oxabicyclo[3.3.1]nonane-2,6-diol, (b) 1,2,3-Benzenetriol, (c) glibenclamide, and (d) metformin interactions in the binding pocket of IL-6. Green, light blue, pink, orange, and violet broken lines represent conventional hydrogen, carbon-hydrogen, pi-alkyl, attractive, and pi-sigma bonds, respectively. Light green circles represent Van der Waals interactions. Figure S4: 2D representation of (a) 9-Oxabicyclo[3.3.1]nonane-2,6-diol, (b) 1,2,3-Benzenetriol, (c) glibenclamide, and (d) metformin interactions in the binding pocket of TNF-α. Green, light blue, pink, violet, and broken red lines represent conventional hydrogen, carbon-hydrogen, pi-alkyl, pi-sigma, and unfavourable bonds, respectively. Light green circles represent Van der Waals interactions. [file 9778486.f1.docx]

***Terminalia catappa* extract palliates redox imbalance and inflammation in diabetic rats by upregulating Nrf-2**

**Franklyn Nonso Iheagwam1,2*, Gaber El-Saber Batiha3, Olubanke Olujoke Ogunlana1,2 and Shalom Nwodo Chinedu1,2**

1Department of Biochemistry, Covenant University, P.M.B. 1023 Ota, Ogun State, Nigeria.

2Covenant University Public Health and Wellbeing Research Cluster (CUPHWERC), Covenant University, P.M.B. 1023 Ota, Ogun State, Nigeria.

3Department of Pharmacology and Therapeutics, Faculty of Veterinary Medicine, Damanhour University, Damanhour 22511, AlBeheira, Egypt.

*Corresponding Author: [franklyn.iheagwam@covenantuniversity.edu.ng](mailto:franklyn.iheagwam@covenantuniversity.edu.ng)

**Table S1:** Grid map specifications for molecular docking

|  |  | **Nrf-2** | **IL-6** | **TNF-α** |
| --- | --- | --- | --- | --- |
|  | **x** | -1.19 | 34.91 | 15.04 |
| **Centre** | **y** | -0.87 | 23.38 | -6.24 |
|  | **z** | 5.38 | 11.08 | 34.67 |
|  | **x** | 37.53 | 38.14 | 41.95 |
| **Dimension** | **y** | 36.59 | 39.37 | 41.85 |
|  | **z** | 38.20 | 49.98 | 58.78 |

| **a)** 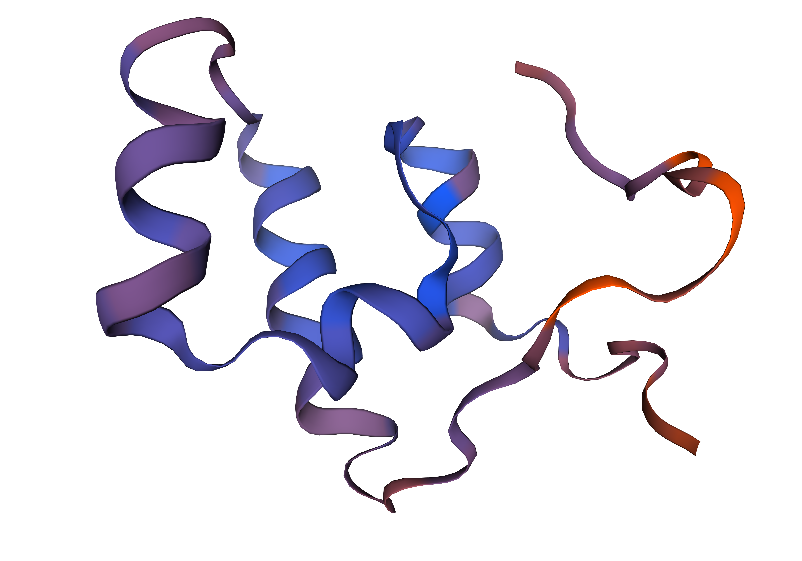 | **b)** 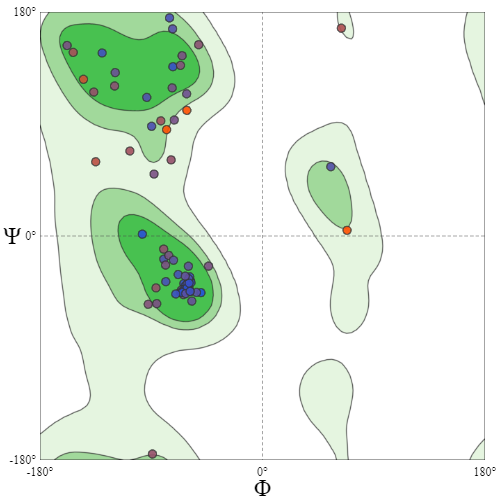 |
| --- | --- |

**Figure S1:** Representation of (a) Modelled Nrf-2 structure and (b) corresponding Ramachandran plot.

| **a) 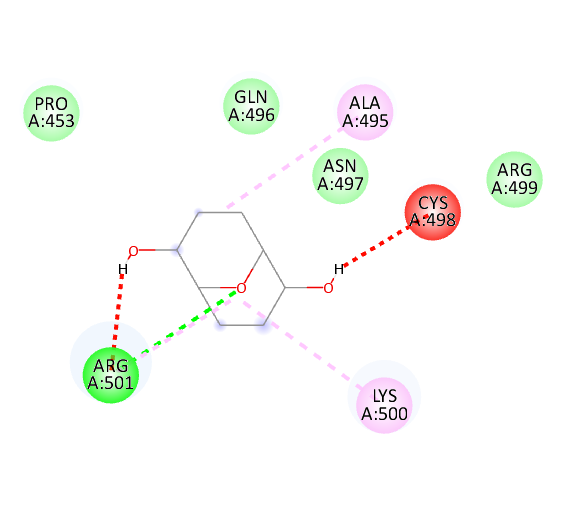** | **b) 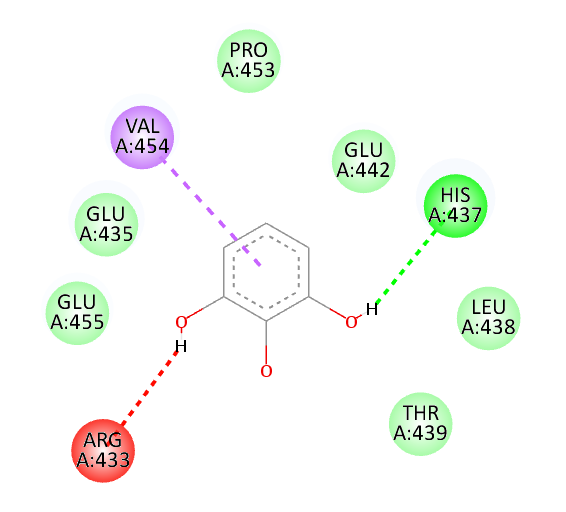** |
| --- | --- |
| **c) 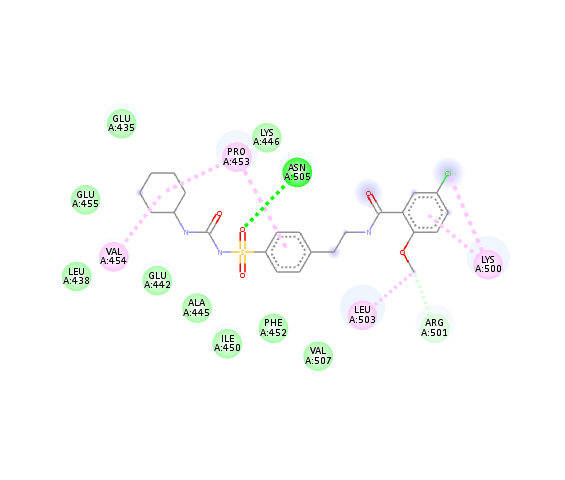** | **d) 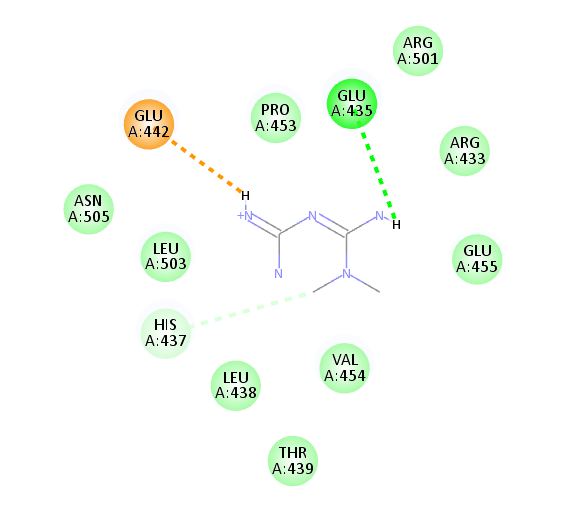** |

**Figure S2:** 2Drepresentation of (a) 9-Oxabicyclo[3.3.1]nonane-2,6-diol, (b) 1,2,3-Benzenetriol, (c) Glibenclamide and (d) Metformin interactions in the binding pocket of Nrf-2. Green, light blue, pink, orange, violet and broken red lines represent conventional hydrogen, carbon-hydrogen, pi-alkyl, salt bridge, pi-sigma and unfavourable bonds, respectively. Light green circles represent Van der Waals interactions.

| **a) 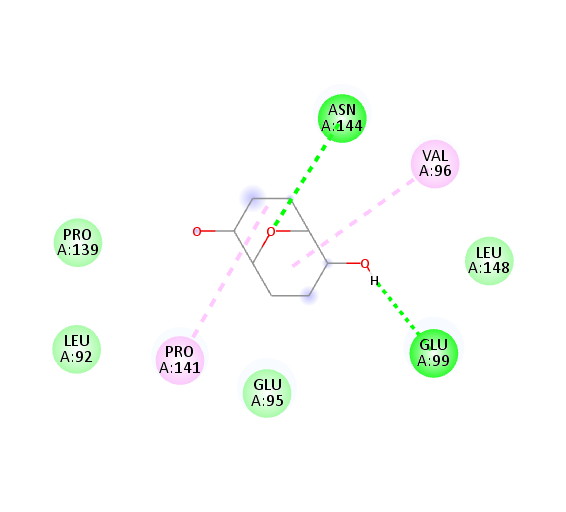** | **b) 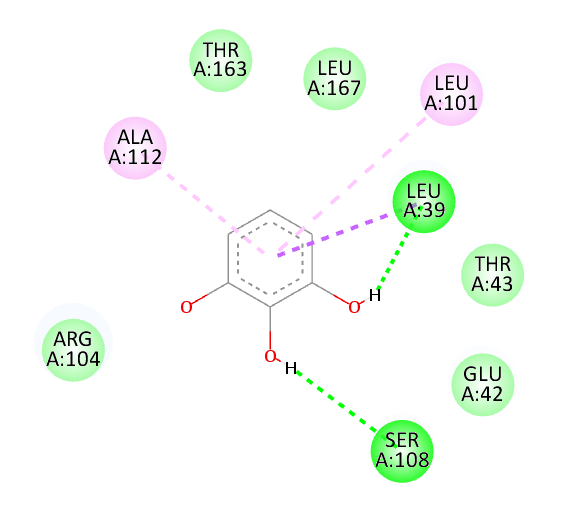** |
| --- | --- |
| **c) 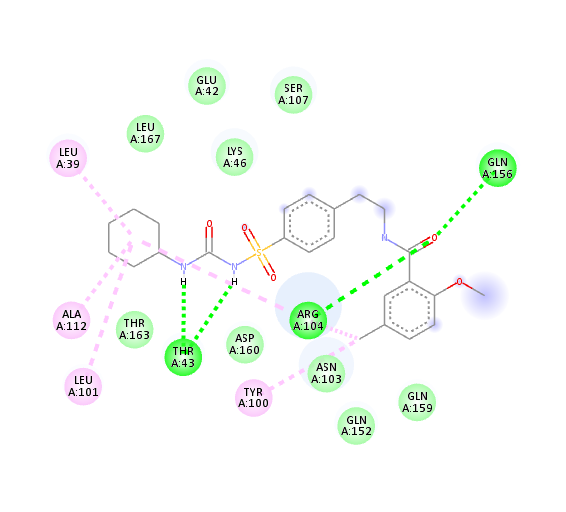** | **d) 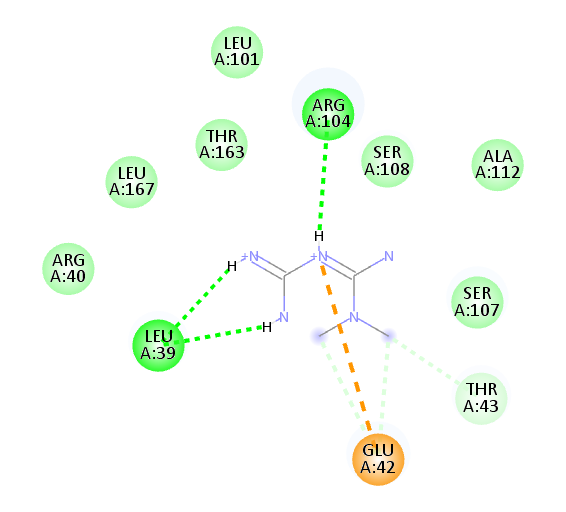** |

**Figure S3:** 2Drepresentation of (a) 9-Oxabicyclo[3.3.1]nonane-2,6-diol, (b) 1,2,3-Benzenetriol, (c) Glibenclamide and (d) Metformin interactions in the binding pocket of IL-6. Green, light blue, pink, orange and violet broken lines represent conventional hydrogen, carbon-hydrogen, pi-alkyl, attractive and pi-sigma bonds, respectively. Light green circles represent Van der Waals interactions.

| **a) 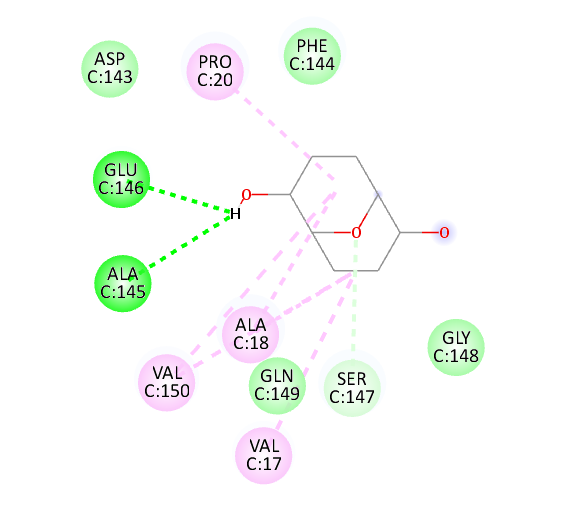** | **b) 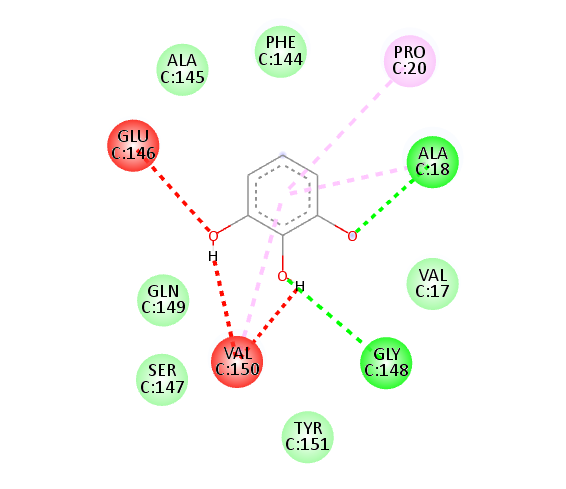** |
| --- | --- |
| **c) 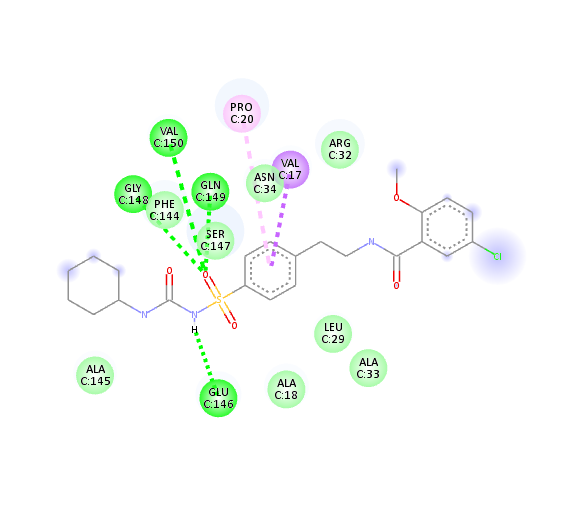** | **d) 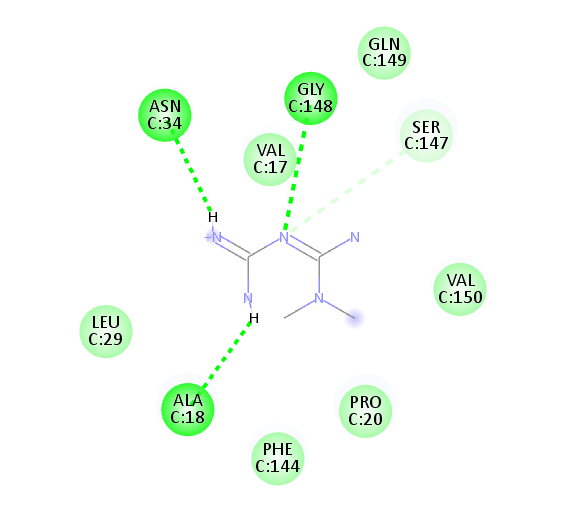** |

**Figure S4:** 2Drepresentation of (a) 9-Oxabicyclo[3.3.1]nonane-2,6-diol, (b) 1,2,3-Benzenetriol, (c) Glibenclamide and (d) Metformin interactions in the binding pocket of TNF-α. Green, light blue, pink, violet and broken red lines represent conventional hydrogen, carbon-hydrogen, pi-alkyl, pi-sigma and unfavourable bonds, respectively. Light green circles represent Van der Waals interactions.
